# Supplementary material
Source: Springer Nature journal article supplement (https://www.springermedizin.de/resource/supplementary/12931_2011_1131_MOESM6_ESM.pdf/9425382)

**A** A549 cells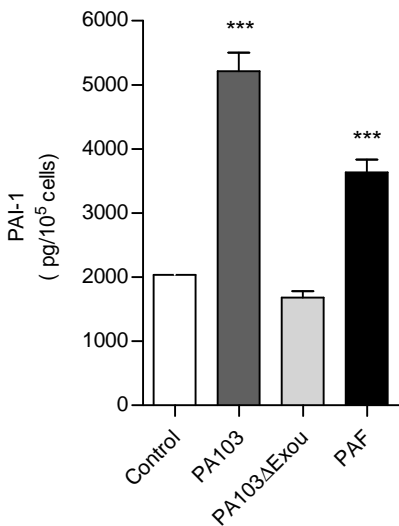**B** THP-1 cells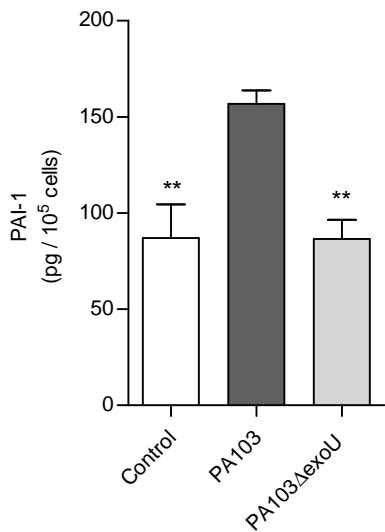**C**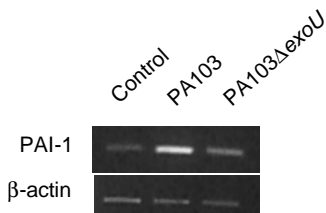**D**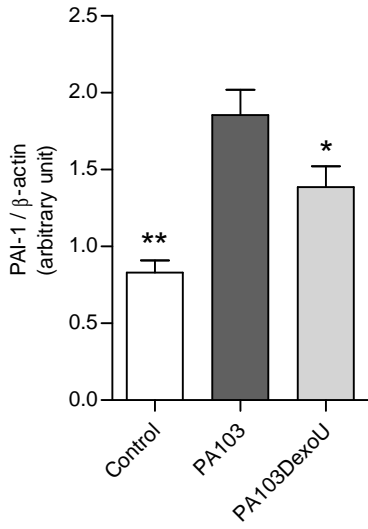

Supplement: MOESM6 [file 9425382]
